# Supplementary material
Source: PubMed Central journal article supplement (PMC3457228)
Supplement: JB.00792-12_zjb999091844so1.pdf [file JB.00792-12_zjb999091844so1.pdf]

## **SUPPLEMENTARY DATA**

**for**

Fatty acid biosynthesis in *Pseudomonas aeruginosa* is initiated by FabY: A new class of  $\beta$ -ketoacyl acyl carrier protein synthases

Yanqiu Yuan<sup>†</sup>, Meena Sachdeva<sup>†</sup>, Jennifer A. Leeds<sup>†</sup>, and Timothy C. Meredith<sup>†</sup>  
<sup>†</sup> Infectious Diseases Area, Novartis Institutes for BioMedical Research, Cambridge MA 02139, USA.

**Table S1: List of Primers**

| Primers                           | Sequence                                                               |
|-----------------------------------|------------------------------------------------------------------------|
| fabH Se for EcoRI <sup>a</sup>    | aaaaaagaattcgtatataaccgaaaagtgactg                                     |
| fabH Se rev KpnI <sup>a</sup>     | aaaaaaggtagccacaaatgcaaattgcgtcat                                      |
| gutAEB pKD4 P1                    | atggtgcagagtggtttatcgggctgttccaaaagggcggagaggtgtttaagggcgacacggaatgtg  |
| gutAEB pKD4 P2                    | cgatcccggcgcgatatcgtcggggacagggcctgccacatggacagtgcccaagccagggatgtaacgc |
| fabH Ec KO P1                     | cgccacattgccgcgccaacgaaaccgtttcaacctgggccgctacctgtgacggaa              |
| fabH Ec KO P2                     | ccgcccagatttcagttatgatcggtctacgttaatgcatgaactcatttaaatggcgcg           |
| pWebUp Seq                        | cctgacgtctaagaaacct                                                    |
| pWebDown Seq                      | acacgggtgctgactgcg                                                     |
| PA3333 P1 <sup>b</sup>            | tacaaaaaagcaggtccacctgctgatgatgagc                                     |
| PA3333 P2 <sup>b</sup>            | cccatccactaaattfaaafagctgccagggccgcagac                                |
| PA3333 P3 <sup>b</sup>            | tattaaatttagtgatgggacgttccgacaatggactg                                 |
| PA3333 P4 <sup>b</sup>            | tacaagaaagctgggtgaatacagagcgcgagtagaag                                 |
| PA0999 P1 BamHI <sup>a</sup>      | cttagaggatccgagaacgagttcag                                             |
| PA0999 P2 <sup>a</sup>            | gtaggtcaggaccagcagctattgatgcg                                          |
| PA0999 P3 <sup>a</sup>            | cgcataatacgtcgtggtctgacctac                                            |
| PA0999 P4 KpnI <sup>a</sup>       | cttagtggtaccgtctcagtcacagag                                            |
| PA0998 P1 BamHI <sup>a</sup>      | cttagaggatccatctcggcaacagattc                                          |
| PA0998 P2 <sup>a</sup>            | ggcatcaggggtgtagctgaactcgttctc                                         |
| PA0998 P3 <sup>a</sup>            | gagaacgagttcagctacacctgatgacc                                          |
| PA0998 P4 EcoRI <sup>a</sup>      | gcttatgaattcagttcgtcagggattc                                           |
| PA3286 P1 BamHI <sup>a</sup>      | cttagaggatcctcagtcgggttttc                                             |
| PA3286 P2 <sup>a</sup>            | catgttcaggttgccctggctgttctgactg                                        |
| PA3286 P3 <sup>a</sup>            | cagtacaacgaccaggccaacctgaacatg                                         |
| PA3286 P4 KpnI <sup>a</sup>       | cttagtggtaccgtagggcgcatactg                                            |
| PA5174 only for <sup>c</sup>      | tagggagaggatcccgtccgtgaagctcgc                                         |
| PA5174 only rev <sup>c</sup>      | gtcagcagggatcccgccttttccgttgtg                                         |
| pET24-PA5174 for <sup>c</sup>     | aaggagatatacatatgtctcgactaccggctat                                     |
| pET24-PA5174 rev <sup>c</sup>     | gtgcggccgcaagcttgcgagcatgtcgcctgaaa                                    |
| PA5174 P1 <sup>c</sup>            | ggccagtgccaagctcagaacccgaccaag                                         |
| PA5174 P2 <sup>c</sup>            | gaaaccaacaatgacc                                                       |
| Gent for PA5174 <sup>c</sup>      | gtcattgttggttccgagctcgaattgac                                          |
| Gent rev PA5174 <sup>c</sup>      | ggttatataccgtcaggcttgaacgaattg                                         |
| fabH Ec for <sup>c</sup>          | tgacggtatataaccg                                                       |
| fabH Ec rev <sup>c</sup>          | gcaaattgcgtcatgt                                                       |
| PA5174 P3 <sup>c</sup>            | catgacgcaattgccatctacaactcgg                                           |
| PA5174 P4 <sup>c</sup>            | acgaattcgagctcagtagaccaggcatgag                                        |
| PA5174 pZEN for NdeI <sup>a</sup> | gttatgcatatgacgcgaacgactattc                                           |
| PA5174 pZEN rev XbaI <sup>a</sup> | gttatgtctagaggccttttccgttgtg                                           |
| cvil P1 <sup>c</sup>              | ggccagtgccaagctaggtgtgtcccaag                                          |
| cvil P2 <sup>c</sup>              | gtagagccgtctatgtacc                                                    |
| Gent for cvil <sup>c</sup>        | catagacggctctaccgagctcgaattgac                                         |
| Gent rev cvil <sup>c</sup>        | gaaactgaccgttcggcttgaacgaattg                                          |
| cvil P3 <sup>c</sup>              | gaagcggctcagtttctctgc                                                  |
| cvil P4 <sup>c</sup>              | acgaattcgagctcggatttacgctgctg                                          |

<sup>a</sup> Cloned into vectors using PCR (overlap assembly if needed), DNA digestion, and T4 DNA ligase.

<sup>b</sup> Cloned using the Gateway system (Invitrogen). <sup>c</sup> Cloned using the In-Fusion system (Clontech).

**Table S2: *P. aeruginosa* PAO1 Cosmid Summary**

| Cosmid isolate | P. aeruginosa PAO1 Genome Coordinates |                        | Insert length (bp) | Orientation <sup>c</sup> | Complements <i>Ec fabH</i> <sup>d</sup> |
|----------------|---------------------------------------|------------------------|--------------------|--------------------------|-----------------------------------------|
|                | Left end <sup>a</sup>                 | Right end <sup>b</sup> |                    |                          |                                         |
| pTMYcos1       | 5825905                               | 5859122                | 33217              | R                        | Yes                                     |
| pTMYcos2       | 5826015                               | 5850856                | 24841              | R                        | Yes                                     |
| pTMYcos3       | 2576368                               | 2611546                | 35178              | R                        | No                                      |
| pTMYcos4       | 5825903                               | 5867229                | 41326              | R                        | Yes                                     |
| pTMYcos5       | 5826022                               | 5861271                | 35249              | R                        | Yes                                     |
| pTMYcos6       | 5826020                               | 5861972                | 35952              | R                        | Yes                                     |
| pTMYcos7       | 5826085                               | 5860971                | 34886              | R                        | Yes                                     |
| pTMYcos8       | 5826052                               | 5859591                | 33539              | R                        | Yes                                     |
| pTMYcos9       | 5826002                               | 5866799                | 40797              | R                        | Yes                                     |
| pTMYcos10      | 5825889                               | 5861887                | 35998              | R                        | Yes                                     |
| pTMYcos11      | 5825938                               | 5863737                | 37799              | R                        | Yes                                     |
| pTMYcos12      | 3500948                               | 3467718                | 33230              | L                        | No                                      |
| pTMYcos13      | 5863014                               | 5826030                | 36984              | L                        | Yes                                     |
| pTMYcos14      | 5825990                               | 5860787                | 34797              | R                        | Yes                                     |
| pTMYcos15      | 5825892                               | 5859442                | 33550              | R                        | Yes                                     |
| pTMYcos16      | 2424390                               | 2459310                | 34920              | R                        | No                                      |
| pTMYcos17      | 5826114                               | 5868327                | 42213              | R                        | Yes                                     |

<sup>a</sup> Determined with pWEBdown primer. <sup>b</sup> Determined with pWEBup primer. <sup>c</sup> R- PA5174 is next to plasmid T7 promoter; L- PA5174 is next to M13 primer site. <sup>d</sup> Rescues growth of *fabH* depleted *E. coli* strain TMY19.

**Table S3: Relative abundance of fatty acids in *P. aeruginosa* PAO1 KASIII domain ORF mutants <sup>a</sup>**

| Fatty acid     | PAO1 wt NB52019 <sup>b</sup> | TMT15 ΔPA0998 | TMT02 ΔPA0999 | TMT01 ΔPA3333 <sup>b</sup> | TMT12 ΔPA3286 <sup>b</sup> | TMT16 Quad KO <sup>c</sup> |
|----------------|------------------------------|---------------|---------------|----------------------------|----------------------------|----------------------------|
| 10:0 3OH       | 2.90±0.17                    | 3.38          | 3.48          | 2.89±0.90                  | 3.01±0.25                  | 3.61                       |
| 12:0           | 3.68±0.12                    | 4.07          | 4.42          | 3.65±0.99                  | 3.59±0.46                  | 4.90                       |
| 12:0 2OH       | 5.13±0.65                    | 5.42          | 6.05          | 4.87±1.14                  | 5.16±0.28                  | 6.32                       |
| 12:0 3OH       | 4.57±0.17                    | 5.00          | 5.44          | 4.72±0.71                  | 5.14±0.15                  | 5.74                       |
| 16:1 ω7c       | 9.68±0.07                    | 10.08         | 9.58          | 11.75±0.09                 | 8.75±1.34                  | 11.05                      |
| 16:0           | 33.73±0.54                   | 33.25         | 33.17         | 31.92±0.50                 | 31.4±1.05                  | 31.24                      |
| 17:0 cyclo ω7c | 2.14±0.71                    | 1.92          | 2.39          | 1.10±0.26                  | 1.82±0.26                  | 1.58                       |
| 18:1 ω 7c      | 32.85±2.77                   | 32.44         | 30.34         | 35.55±4.07                 | 34.88±0.42                 | 31.69                      |
| 19:0 cyclo ω7c | 2.95±0.80                    | 2.44          | 3.02          | 1.28±0.04                  | 3.85±2.21                  | 1.85                       |

<sup>a</sup> Biomass scraped from LB agar plates. <sup>b</sup> From two independent experimental replicates.

<sup>c</sup> ΔPA0998 ΔPA0999 ΔPA3333 ΔPA3286

## Supplementary Figure 1

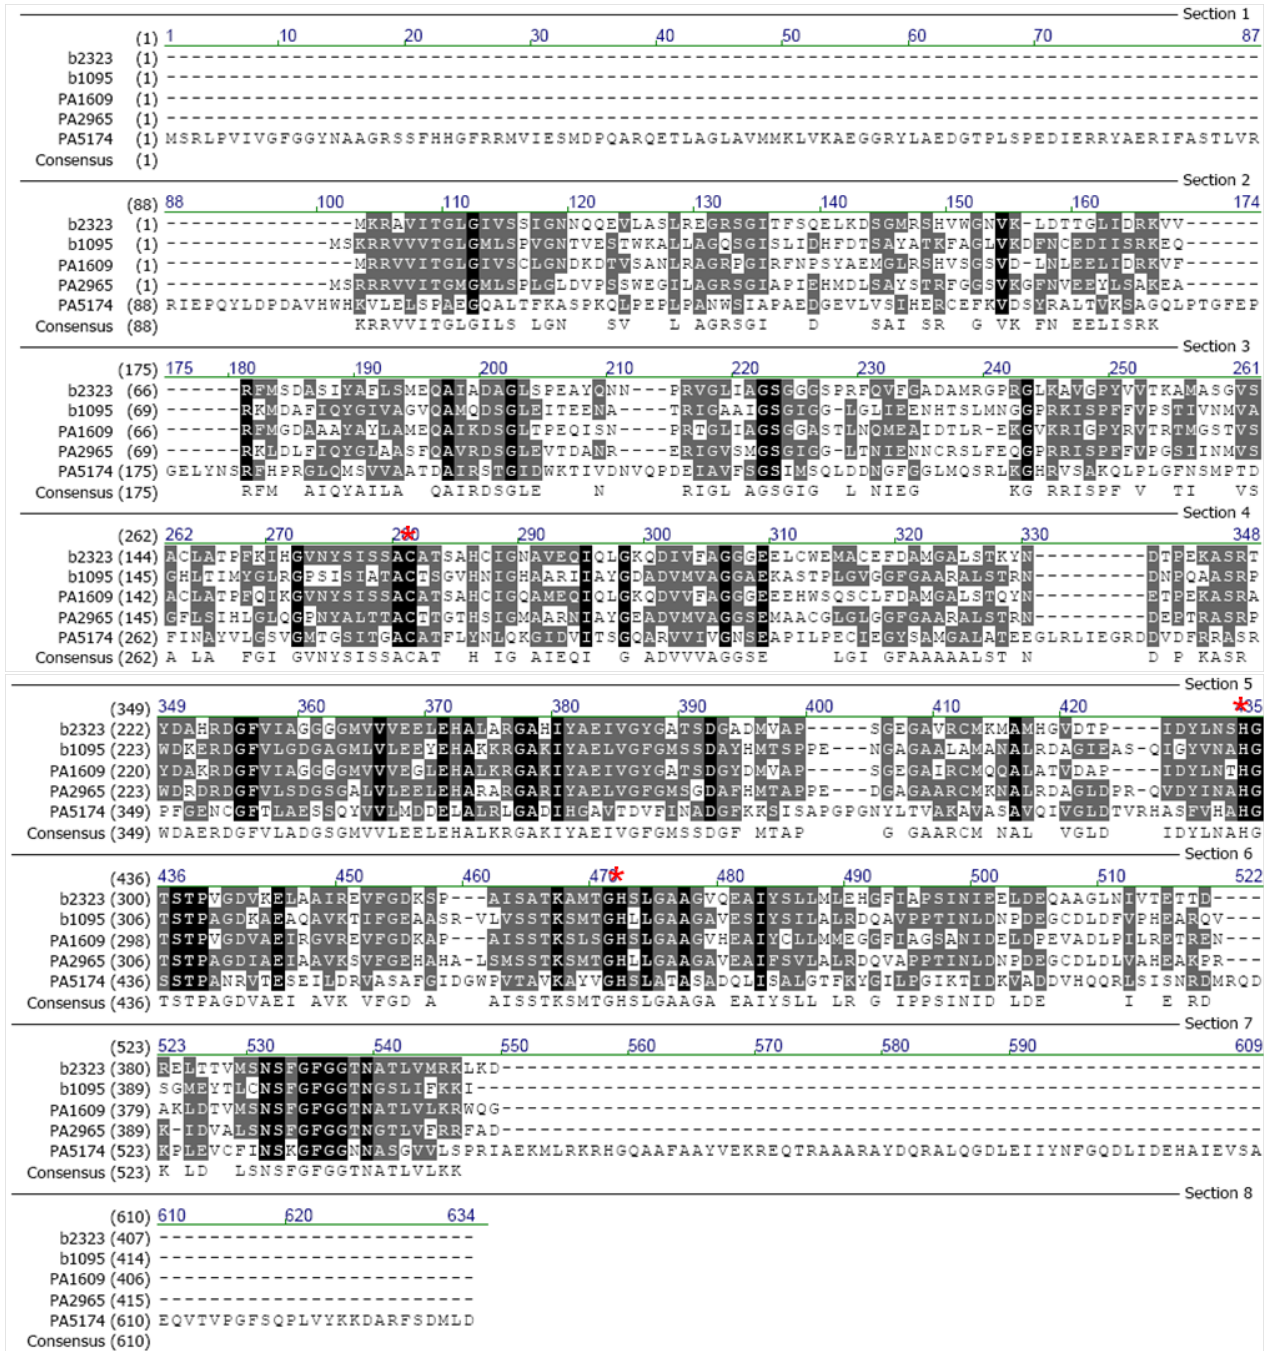

**Supplementary Figure 1:** Protein sequence alignment of KASI/II domain proteins in *P. aeruginosa* and *E. coli* MG1655. Identical amino acid residues are highlighted in black and conservative substitutions are in gray. Red asterisks denote active sites amino acid residues in *E. coli* FabB (Cys163-His-298-His-333) (86). b2323- *E. coli* MG1655 FabB; b1095- *E. coli* MG1655 FabF; PA1609- *P. aeruginosa* PAO1 FabB; PA2965- *P. aeruginosa* PAO1 FabF; PA5174- *P. aeruginosa* PAO1 FabY.
